# Supplementary material for: High-pressure phase transitions in ordered and disordered Bi2Te2Se
Source: Royal Society of Chemistry journal article supplement (doi:10.1039/c5dt02022k), 2015-01-01
Supplement: c5dt02022k1.pdf [file c5dt02022k1.pdf]

Supporting information for

# High-pressure Phase Transitions in Ordered and Disordered Bi<sub>2</sub>Te<sub>2</sub>Se

*Morten B. Nielsen<sup>1</sup>, Paraskevas Parisiades<sup>2</sup>, Solveig R. Madsen<sup>1</sup>, Martin Bremholm<sup>1\*</sup>*

<sup>1</sup> Center for Materials Crystallography (CMC), Department of Chemistry and iNANO, Aarhus University, Langelandsgade 140, 8000 Aarhus C, Denmark

<sup>2</sup> European Synchrotron Radiation Facility, Beamline ID27, 71 Avenue des Martyrs, CS 40220, 38043, Grenoble Cedex 9, France

\* Corresponding author. Email: [bremholm@chem.au.dk](mailto:bremholm@chem.au.dk)

## **Contents of Supporting Information**

2D integrated dataset plot (Fig. S1)

Full diffraction raw data set plots (Fig. S2 and S3)

Rietveld refinement results (Table ST1)

Rietveld refinement models attempted for the  $\delta$  phase (Fig. S4-S6)

Part 1 – 2D integrated dataset plot

Figure S1

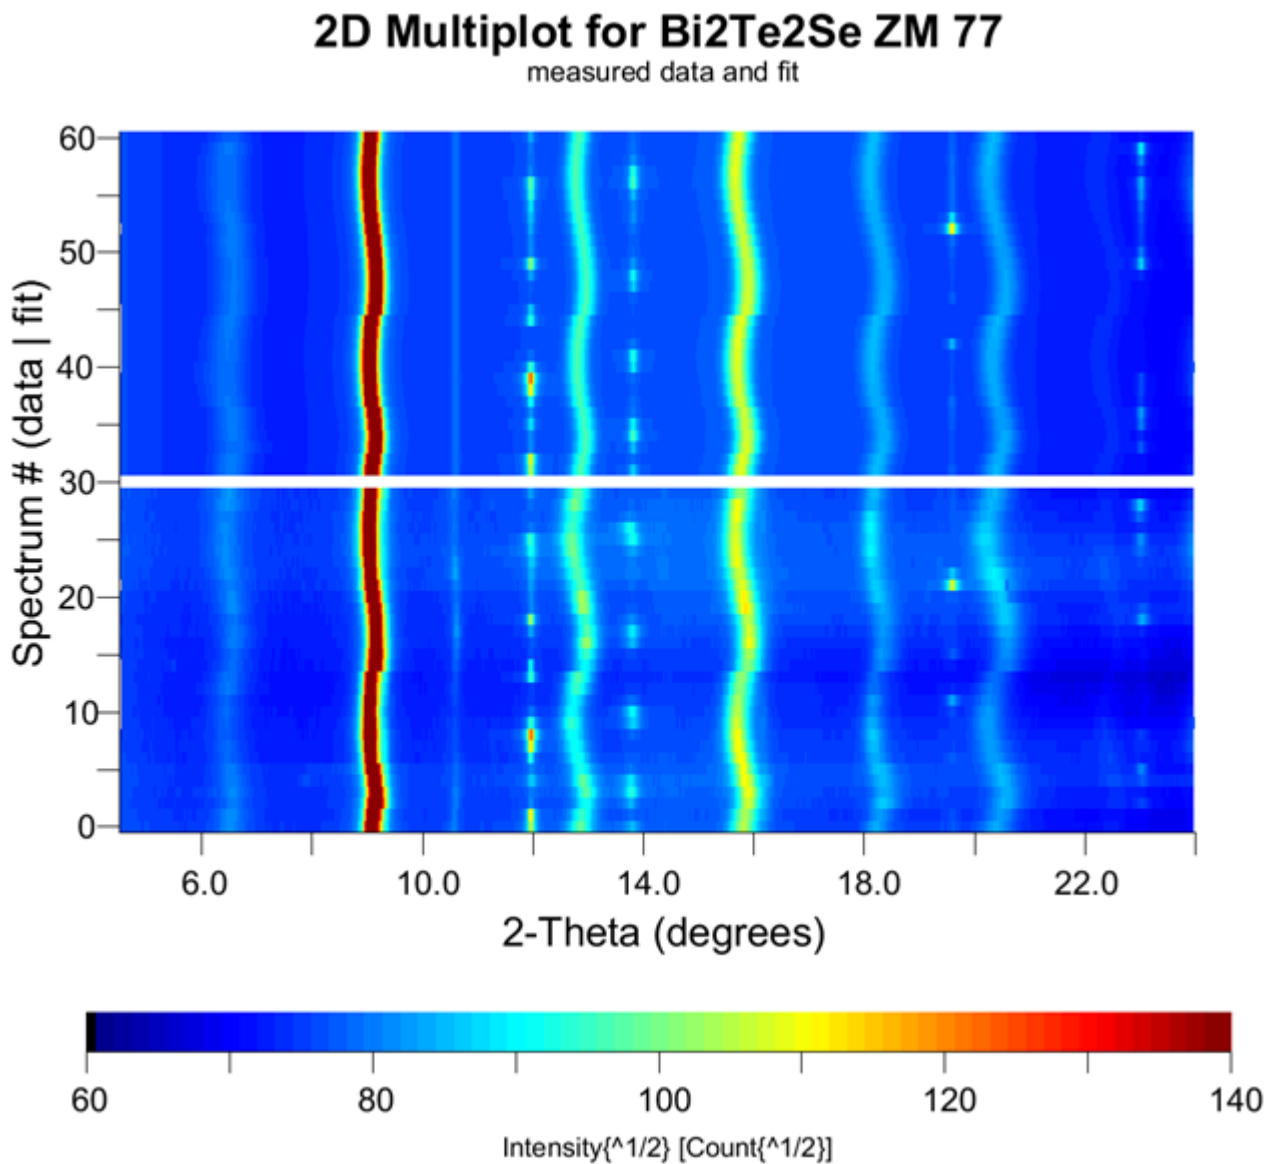

An example of an integrated high pressure dataset (bottom panel) and refinement (top panel) from the SB sample containing the  $\delta$  phase at 57 GPa. Scattering angle makes up the first axis, azimuthal angle (going around the Debye-Scherrer ring) constitutes the second axis and the color scale shows the intensity. The wavy character of the sample diffraction lines is caused by the presence of strong anisotropic strain.

Part 2 – Raw data plots

Figure S2

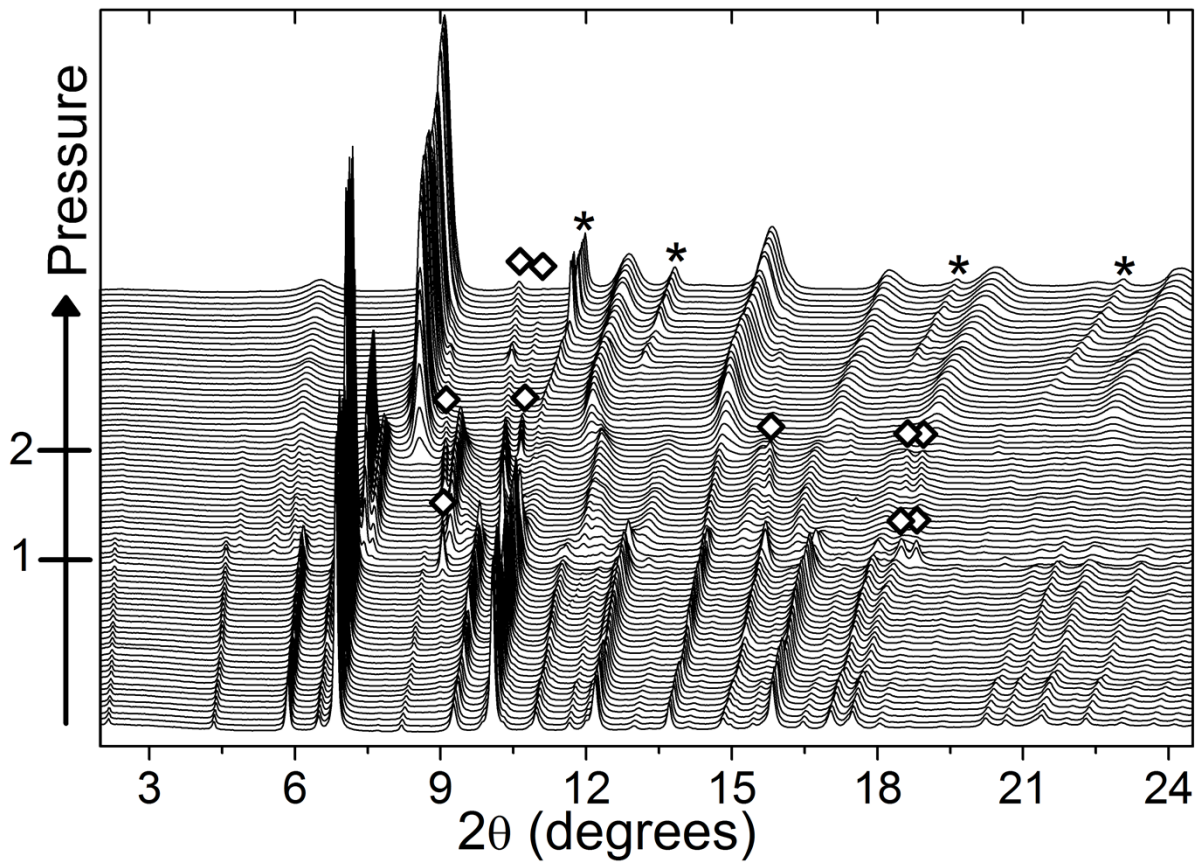

Full refined  $2\theta$  range plot of the raw data of the SB sample. Diamonds indicate diffraction peaks from the rhenium gasket, the asterisks indicate neon diffraction.

Figure S3

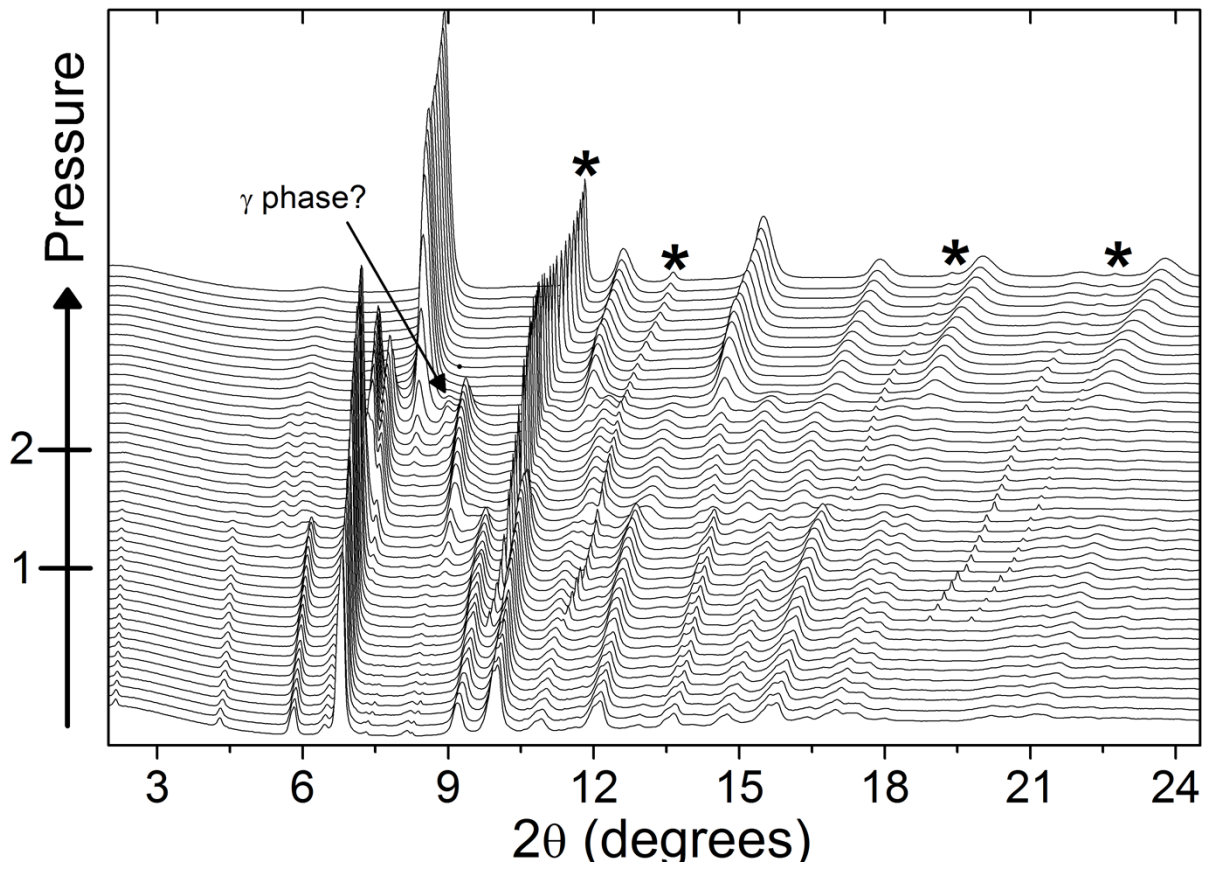

Full refined  $2\theta$  range plot of the raw data of the Q sample. The arrow indicates a cluster of diffraction peaks that fit with the  $\gamma$ - $\text{Bi}_2\text{Te}_3$  structure (though the data quality does not allow refinement), the asterisks indicate neon diffraction.

## Part 2 – Refinement results

**Table ST1**

The full unit cell results versus pressure for both the SB and the Q sample.  
SB sample data:

| SB sample, $\alpha$ phase |             |          |             |          |             |          |             |
|---------------------------|-------------|----------|-------------|----------|-------------|----------|-------------|
| $P$                       | $\sigma(P)$ | $a$      | $\sigma(a)$ | $c$      | $\sigma(c)$ | $V/f.u.$ | $\sigma(V)$ |
| 0.84                      | 0.01        | 4.264496 | 0.000072    | 29.6825  | 0.0019      | 155.83   | 0.14        |
| 0.86                      | 0.01        | 4.259381 | 9.65E-05    | 29.61368 | 0.0025      | 155.09   | 0.18        |
| 1.12                      | 0.01        | 4.252691 | 9.70E-05    | 29.52148 | 0.0025      | 154.13   | 0.18        |
| 1.59                      | 0.01        | 4.240706 | 1.02E-04    | 29.3657  | 0.0027      | 152.45   | 0.19        |
| 1.76                      | 0.02        | 4.235639 | 1.02E-04    | 29.30772 | 0.0027      | 151.79   | 0.19        |
| 2.01                      | 0.02        | 4.228362 | 9.91E-05    | 29.24928 | 0.0025      | 150.96   | 0.18        |
| 2.40                      | 0.02        | 4.219243 | 1.00E-04    | 29.16194 | 0.0020      | 149.86   | 0.14        |
| 2.71                      | 0.02        | 4.211109 | 1.09E-04    | 29.06712 | 0.0027      | 148.80   | 0.19        |
| 3.45                      | 0.03        | 4.193832 | 1.51E-04    | 28.92472 | 0.0029      | 146.86   | 0.21        |
| 3.72                      | 0.03        | 4.187491 | 1.42E-04    | 28.86927 | 0.0029      | 146.13   | 0.20        |
| 3.81                      | 0.03        | 4.180234 | 1.37E-04    | 28.8125  | 0.0026      | 145.34   | 0.18        |
| 4.36                      | 0.03        | 4.173712 | 1.12E-04    | 28.75571 | 0.0012      | 144.60   | 0.09        |
| 4.65                      | 0.04        | 4.16659  | 1.12E-04    | 28.72292 | 0.0012      | 143.95   | 0.08        |
| 4.94                      | 0.04        | 4.16027  | 1.23E-04    | 28.67348 | 0.0015      | 143.26   | 0.10        |
| 5.16                      | 0.04        | 4.154248 | 1.46E-04    | 28.64049 | 0.0024      | 142.68   | 0.17        |
| 5.55                      | 0.04        | 4.14602  | 1.54E-04    | 28.59611 | 0.0018      | 141.90   | 0.12        |
| 5.81                      | 0.04        | 4.140986 | 1.27E-04    | 28.54727 | 0.0013      | 141.31   | 0.09        |
| 6.09                      | 0.05        | 4.134426 | 1.25E-04    | 28.51984 | 0.0013      | 140.73   | 0.09        |
| 6.47                      | 0.05        | 4.129221 | 1.22E-04    | 28.4762  | 0.0012      | 140.16   | 0.08        |
| 6.79                      | 0.05        | 4.122891 | 1.22E-04    | 28.43515 | 0.0012      | 139.53   | 0.08        |
| 7.14                      | 0.05        | 4.115904 | 1.24E-04    | 28.39352 | 0.0013      | 138.85   | 0.09        |
| 7.49                      | 0.06        | 4.10911  | 1.23E-04    | 28.36143 | 0.0027      | 138.24   | 0.18        |
| 7.98                      | 0.06        | 4.099131 | 1.43E-04    | 28.31685 | 0.0026      | 137.35   | 0.17        |
| 8.59                      | 0.07        | 4.086654 | 1.38E-04    | 28.25267 | 0.0025      | 136.21   | 0.17        |
| 8.81                      | 0.07        | 4.081208 | 1.21E-04    | 28.2145  | 0.0013      | 135.66   | 0.09        |
| 9.15                      | 0.07        | 4.074996 | 1.18E-04    | 28.18367 | 0.0027      | 135.10   | 0.18        |
| 9.50                      | 0.07        | 4.069487 | 1.40E-04    | 28.15786 | 0.0016      | 134.61   | 0.11        |
| 10.06                     | 0.08        | 4.061654 | 1.11E-04    | 28.11713 | 0.0023      | 133.90   | 0.15        |
| 10.60                     | 0.08        | 4.050412 | 1.59E-04    | 28.05606 | 0.0029      | 132.87   | 0.19        |
| 10.92                     | 0.08        | 4.045268 | 1.55E-04    | 28.04174 | 0.0029      | 132.47   | 0.19        |
| 11.36                     | 0.09        | 4.037609 | 1.28E-04    | 28.04843 | 0.0026      | 132.00   | 0.17        |
| 11.87                     | 0.09        | 4.029526 | 1.22E-04    | 27.99364 | 0.0022      | 131.21   | 0.14        |
| 12.12                     | 0.09        | 4.020888 | 1.44E-04    | 27.99295 | 0.0023      | 130.65   | 0.15        |
| 13.03                     | 0.10        | 4.011444 | 1.86E-04    | 27.93229 | 0.0030      | 129.75   | 0.20        |
| 13.52                     | 0.10        | 4.010901 | 3.30E-04    | 27.90734 | 0.0051      | 129.60   | 0.33        |
| 13.96                     | 0.11        | 3.991095 | 2.86E-05    | 27.86697 | 0.002362    | 128.140  | 0.152       |

SB sample,  $\beta$  phase

| $P$   | $\sigma(P)$ | $a$      | $\sigma(a)$ | $b$      | $\sigma(b)$ | $c$      | $\sigma(c)$ | $\beta$  | $\sigma(\beta)$ | V/f.u. | $\sigma(V)$ |
|-------|-------------|----------|-------------|----------|-------------|----------|-------------|----------|-----------------|--------|-------------|
| 11.87 | 0.09        | 14.34807 | 5.73E-04    | 3.996757 | 1.75E-04    | 17.0865  | 2.59E-04    | 148.7354 | 0.0017          | 127.13 | 0.35        |
| 12.12 | 0.09        | 14.33983 | 3.78E-04    | 3.987552 | 1.63E-04    | 17.05299 | 6.73E-04    | 148.7808 | 0.0021          | 126.35 | 0.45        |
| 13.03 | 0.10        | 14.31279 | 5.67E-04    | 3.977449 | 1.45E-04    | 17.00214 | 5.98E-04    | 148.7687 | 0.0019          | 125.46 | 0.39        |
| 13.52 | 0.10        | 14.30128 | 5.19E-04    | 3.959874 | 1.21E-04    | 16.95537 | 4.50E-04    | 148.6982 | 0.0014          | 124.72 | 0.28        |
| 13.96 | 0.11        | 14.29128 | 5.19E-04    | 3.949874 | 1.21E-04    | 16.91537 | 4.50E-04    | 148.6082 | 0.0014          | 124.34 | 0.28        |
| 14.36 | 0.11        | 14.2834  | 9.51E-04    | 3.92E+00 | 1.89E-04    | 16.86684 | 8.24E-04    | 148.5402 | 0.0025          | 123.07 | 0.51        |
| 14.74 | 0.11        | 14.2676  | 9.12E-04    | 3.909031 | 1.88E-04    | 16.8383  | 8.26E-04    | 148.5239 | 0.0025          | 122.59 | 0.50        |
| 15.23 | 0.12        | 14.23335 | 5.61E-04    | 3.905411 | 2.21E-04    | 16.80772 | 7.55E-04    | 148.4804 | 0.0025          | 122.11 | 0.50        |
| 15.63 | 0.12        | 14.21979 | 1.10E-03    | 3.897304 | 1.93E-04    | 16.77865 | 8.26E-04    | 148.484  | 0.0026          | 121.52 | 0.52        |
| 16.30 | 0.13        | 14.1741  | 0.001154    | 3.884991 | 2.14E-04    | 16.72542 | 8.58E-04    | 148.4381 | 0.0029          | 120.52 | 0.56        |
| 16.71 | 0.13        | 14.16411 | 9.38E-04    | 3.878494 | 2.25E-04    | 16.70154 | 5.39E-04    | 148.4282 | 0.0023          | 120.09 | 0.45        |
| 17.12 | 0.13        | 14.15638 | 9.73E-04    | 3.876359 | 2.22E-04    | 16.68548 | 8.41E-04    | 148.4117 | 0.0028          | 119.90 | 0.55        |
| 17.59 | 0.14        | 14.13189 | 8.33E-04    | 3.870805 | 2.18E-04    | 16.65068 | 6.76E-04    | 148.4364 | 0.0007          | 119.19 | 0.14        |
| 18.01 | 0.14        | 14.10639 | 0.001047    | 3.866533 | 2.25E-04    | 16.62504 | 8.56E-04    | 148.4244 | 0.0032          | 118.70 | 0.61        |
| 18.51 | 0.15        | 14.07748 | 8.20E-04    | 3.86149  | 2.32E-04    | 16.59255 | 4.32E-04    | 148.4013 | 0.0020          | 118.15 | 0.39        |
| 18.98 | 0.15        | 14.07169 | 9.32E-04    | 3.85369  | 2.07E-04    | 16.56933 | 7.95E-04    | 148.4112 | 0.0029          | 117.67 | 0.56        |
| 19.59 | 0.15        | 14.04522 | 0.001078    | 3.84206  | 2.35E-04    | 16.5237  | 9.20E-04    | 148.3111 | 0.0032          | 117.10 | 0.60        |
| 19.87 | 0.16        | 14.03987 | 0.001212    | 3.834779 | 2.66E-04    | 16.50466 | 0.001052    | 148.2933 | 0.0036          | 116.76 | 0.69        |
| 20.17 | 0.16        | 13.97029 | 0.002608    | 3.835278 | 5.85E-04    | 16.4635  | 0.001615    | 148.186  | 0.0082          | 116.25 | 1.53        |

SB sample,  $\delta$  phase

| $P$   | $\sigma(P)$ | $a$      | $\sigma(a)$ | $V/f.u.$ | $\sigma(V)$ |
|-------|-------------|----------|-------------|----------|-------------|
| 19.59 | 0.15        | 3.544026 | 3.0E-04     | 111.283  | 0.028       |
| 19.87 | 0.16        | 3.54063  | 1.6E-04     | 110.964  | 0.015       |
| 20.17 | 0.16        | 3.539156 | 1.2E-04     | 110.825  | 0.011       |
| 20.50 | 0.16        | 3.538305 | 8.8E-05     | 110.745  | 0.008       |
| 20.82 | 0.16        | 3.535982 | 9.7E-05     | 110.527  | 0.009       |
| 21.21 | 0.17        | 3.533153 | 8.1E-05     | 110.262  | 0.008       |
| 21.49 | 0.17        | 3.529938 | 8.0E-05     | 109.962  | 0.007       |
| 22.05 | 0.18        | 3.525716 | 7.6E-05     | 109.568  | 0.007       |
| 23.03 | 0.18        | 3.520446 | 7.4E-05     | 109.077  | 0.007       |
| 23.11 | 0.19        | 3.517555 | 7.4E-05     | 108.808  | 0.007       |
| 24.01 | 0.19        | 3.510854 | 7.3E-05     | 108.188  | 0.007       |
| 25.72 | 0.21        | 3.499738 | 6.9E-05     | 107.163  | 0.006       |
| 27.37 | 0.22        | 3.488923 | 6.8E-05     | 106.173  | 0.006       |
| 29.04 | 0.24        | 3.477517 | 6.7E-05     | 105.135  | 0.006       |
| 30.42 | 0.25        | 3.468925 | 6.8E-05     | 104.358  | 0.006       |
| 32.04 | 0.26        | 3.45946  | 6.7E-05     | 103.506  | 0.006       |
| 33.70 | 0.28        | 3.444421 | 8.7E-05     | 102.162  | 0.008       |
| 34.69 | 0.29        | 3.438333 | 7.6E-05     | 101.621  | 0.007       |
| 36.93 | 0.31        | 3.432811 | 6.1E-05     | 101.132  | 0.005       |
| 39.57 | 0.33        | 3.419278 | 6.0E-05     | 99.941   | 0.005       |
| 42.01 | 0.36        | 3.406964 | 6.0E-05     | 98.865   | 0.005       |
| 43.08 | 0.37        | 3.399663 | 5.9E-05     | 98.231   | 0.005       |
| 44.78 | 0.39        | 3.392836 | 5.9E-05     | 97.640   | 0.005       |
| 46.20 | 0.40        | 3.387691 | 6.1E-05     | 97.197   | 0.005       |
| 50.05 | 0.44        | 3.368017 | 6.1E-05     | 95.513   | 0.005       |
| 51.01 | 0.45        | 3.364352 | 5.6E-05     | 95.202   | 0.005       |
| 53.14 | 0.47        | 3.354331 | 5.7E-05     | 94.353   | 0.005       |
| 55.25 | 0.49        | 3.34606  | 5.7E-05     | 93.657   | 0.005       |
| 56.94 | 0.51        | 3.338832 | 5.7E-05     | 93.052   | 0.005       |
| 58.67 | 0.53        | 3.331325 | 5.7E-05     | 92.425   | 0.005       |

Q sample,  $\alpha$  phase

| $P$   | $\sigma(P)$ | $a$      | $\sigma(a)$ | $c$     | $\sigma(c)$ | $V/f.u.$ | $\sigma(V)$ |
|-------|-------------|----------|-------------|---------|-------------|----------|-------------|
| 0.18  | 0.01        | 4.301446 | 0.00013     | 29.9341 | 0.0024      | 159.88   | 0.18        |
| 0.49  | 0.01        | 4.293623 | 0.00013     | 29.8386 | 0.0024      | 158.79   | 0.17        |
| 1.23  | 0.01        | 4.271325 | 0.00010     | 29.5955 | 0.0022      | 155.87   | 0.16        |
| 1.71  | 0.01        | 4.258096 | 0.00013     | 29.4792 | 0.0024      | 154.30   | 0.17        |
| 2.09  | 0.02        | 4.246335 | 0.00013     | 29.3504 | 0.0024      | 152.77   | 0.17        |
| 2.59  | 0.03        | 4.232736 | 0.00013     | 29.2350 | 0.0022      | 151.20   | 0.16        |
| 3.12  | 0.03        | 4.218611 | 0.00012     | 29.1326 | 0.0020      | 149.67   | 0.15        |
| 3.52  | 0.04        | 4.206476 | 0.00012     | 29.0570 | 0.0020      | 148.42   | 0.14        |
| 4.16  | 0.03        | 4.192254 | 0.00013     | 28.9608 | 0.0022      | 146.93   | 0.16        |
| 4.74  | 0.04        | 4.181509 | 0.00013     | 28.8787 | 0.0023      | 145.77   | 0.16        |
| 5.42  | 0.04        | 4.169074 | 0.00013     | 28.8123 | 0.0022      | 144.57   | 0.15        |
| 5.81  | 0.04        | 4.155204 | 0.00013     | 28.7547 | 0.0022      | 143.32   | 0.15        |
| 6.39  | 0.05        | 4.144105 | 0.00013     | 28.6894 | 0.0022      | 142.23   | 0.15        |
| 7.18  | 0.05        | 4.129971 | 0.00012     | 28.6132 | 0.0021      | 140.89   | 0.14        |
| 7.73  | 0.06        | 4.116684 | 0.00013     | 28.5639 | 0.0022      | 139.74   | 0.15        |
| 8.67  | 0.07        | 4.098616 | 0.00012     | 28.4489 | 0.0023      | 137.96   | 0.16        |
| 9.11  | 0.07        | 4.087905 | 0.00012     | 28.3819 | 0.0022      | 136.92   | 0.15        |
| 9.58  | 0.07        | 4.076116 | 0.00012     | 28.3161 | 0.0022      | 135.81   | 0.15        |
| 10.30 | 0.08        | 4.06038  | 0.00013     | 28.2141 | 0.0024      | 134.28   | 0.16        |

Q sample,  $\beta$  phase

| $P$   | $\sigma(P)$ | $a$      | $\sigma(a)$ | $b$      | $\sigma(b)$ | $c$      | $\sigma(c)$ | $\beta$  | $\sigma(\beta)$ | $V/f.u.$ | $\sigma(V)$ |
|-------|-------------|----------|-------------|----------|-------------|----------|-------------|----------|-----------------|----------|-------------|
| 13.54 | 0.10        | 14.29013 | 0.001428    | 3.973767 | 2.56E-04    | 16.98313 | 0.001043    | 148.5285 | 0.004281        | 125.87   | 0.88        |
| 14.24 | 0.11        | 14.25663 | 7.37E-04    | 3.96001  | 2.72E-04    | 16.94268 | 0.001035    | 148.5476 | 0.004495        | 124.78   | 0.92        |
| 14.75 | 0.11        | 14.22938 | 1.76E-03    | 3.955917 | 3.51E-04    | 16.91633 | 1.05E-03    | 148.5157 | 0.004586        | 124.33   | 0.93        |
| 15.27 | 0.12        | 14.24115 | 0.001645    | 3.949984 | 2.94E-04    | 16.87264 | 9.67E-04    | 148.4623 | 0.00348         | 124.11   | 0.70        |
| 15.93 | 0.12        | 14.22181 | 0.001191    | 3.924158 | 1.89E-04    | 16.84008 | 6.72E-04    | 148.4706 | 0.002321        | 122.87   | 0.47        |
| 16.70 | 0.13        | 14.19005 | 0.001902    | 3.910674 | 3.51E-04    | 16.75439 | 9.90E-04    | 148.4867 | 0.004057        | 121.49   | 0.80        |
| 17.12 | 0.13        | 14.18414 | 0.002021    | 3.908313 | 3.53E-04    | 16.75268 | 0.001074    | 148.4695 | 0.0041          | 121.42   | 0.81        |
| 17.66 | 0.14        | 14.15765 | 0.001436    | 3.893742 | 2.80E-04    | 16.70858 | 7.40E-04    | 148.413  | 0.002295        | 120.61   | 0.45        |
| 18.42 | 0.14        | 14.10887 | 3.29E-04    | 3.876632 | 2.07E-04    | 16.64589 | 4.80E-04    | 148.435  | 0.002253        | 119.15   | 0.44        |
| 19.72 | 0.16        | 14.05658 | 0.001428    | 3.851646 | 3.22E-04    | 16.54624 | 8.06E-04    | 148.3785 | 0.003254        | 117.42   | 0.62        |



SB sample,  $\delta$  phase

| $P$   | $\sigma(P)$ | $a$      | $\sigma(a)$ | $V/f.u.$ | $\sigma(V)$ |
|-------|-------------|----------|-------------|----------|-------------|
| 20.75 | 0.16        | 3.572415 | 1.09E-04    | 113.979  | 0.010       |
| 21.96 | 0.17        | 3.55997  | 9.07E-05    | 112.792  | 0.009       |
| 23.43 | 0.19        | 3.548711 | 8.49E-05    | 111.725  | 0.008       |
| 25.04 | 0.20        | 3.537706 | 8.20E-05    | 110.689  | 0.008       |
| 26.90 | 0.22        | 3.526833 | 8.11E-05    | 109.672  | 0.008       |
| 28.98 | 0.23        | 3.50893  | 8.24E-05    | 108.010  | 0.008       |
| 31.74 | 0.26        | 3.491611 | 7.99E-05    | 106.419  | 0.007       |
| 34.57 | 0.29        | 3.474197 | 7.68E-05    | 104.834  | 0.007       |
| 37.83 | 0.32        | 3.455109 | 7.46E-05    | 103.116  | 0.007       |
| 41.04 | 0.35        | 3.437752 | 7.29E-05    | 101.570  | 0.006       |
| 43.88 | 0.37        | 3.423111 | 7.12E-05    | 100.277  | 0.006       |
| 46.60 | 0.40        | 3.410337 | 7.03E-05    | 99.159   | 0.006       |
| 48.90 | 0.42        | 3.399661 | 6.99E-05    | 98.231   | 0.006       |

### Part 3 – Rietveld refinements of the Q sample at 47 GPa, using various models.

Figure S4

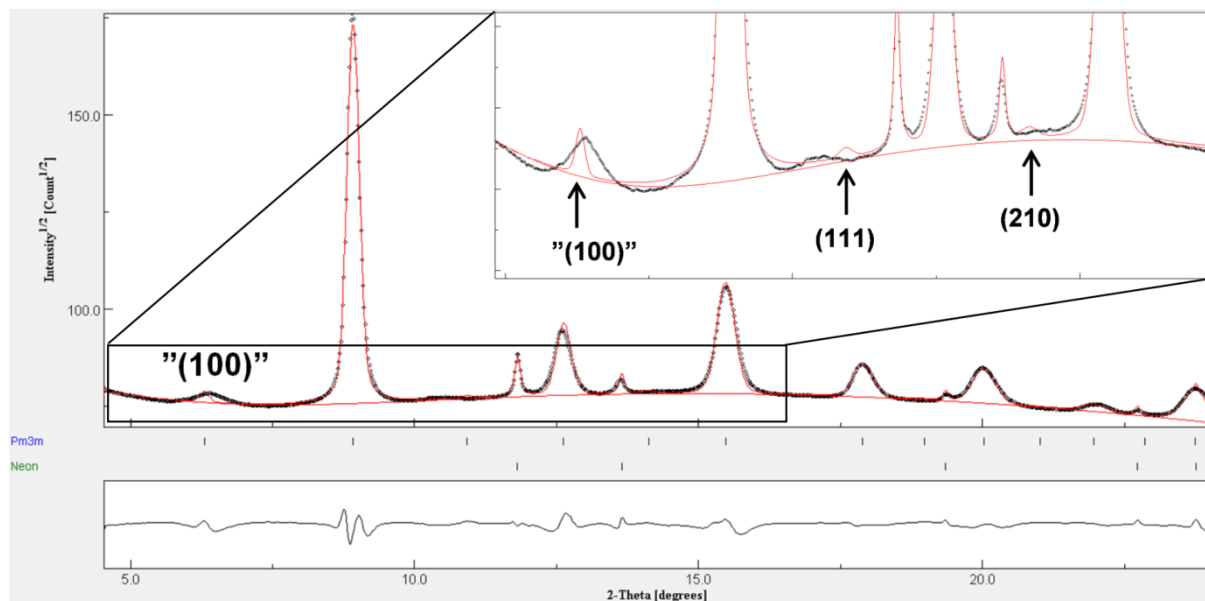

Model 1: A  $Pm\bar{3}m$  space group, Bi/Te totally disordered, and with Se locked in the center of unit cell yields the fit in Fig. S3. The peak shape of the “(100)” reflection ( $\sim 6.4$  degrees) is too broad, leading to the total intensity of this peak being too low. Inset: A zoom in on the lower angle region, showing the lower intensity peaks. The broad signal at about 10.5 degrees corresponds to the main peak of rhenium (the gasket) at this pressure. Increasing the intensity of the “(100)” reflection would lead to increases in the (111) and (210) peaks that already describe too much intensity.

## Model 2: Antiphasing

One effect that would only broaden the superstructure reflections appearing in going from  $Im\bar{3}m$  to  $Pm\bar{3}m$  is antiphase boundaries. The  $hkl$  dependence of this potential source of broadening can be calculated<sup>13</sup> as:

$$\beta(2\theta) = \frac{3 \lambda \gamma (|h| + |k| + |l|)}{2a \cdot \cos(\theta) \sqrt{h^2 + k^2 + l^2}} \quad \text{for } h + k + l = \text{odd}$$

In the equation,  $\lambda$  is the x-ray wavelength and  $\gamma$  is the probability of crossing an antiphase boundary within a given unit cell of length  $a$ . The expression assumes that  $\gamma$  is relatively small. The width predicted by this model scales with  $\gamma$ , but the relative widths of different peaks (such as (100) to (111)) is a constant. The width of a hypothetical (111) peak is thus 1.74 times that of the (100) peak.

**Figure S5**

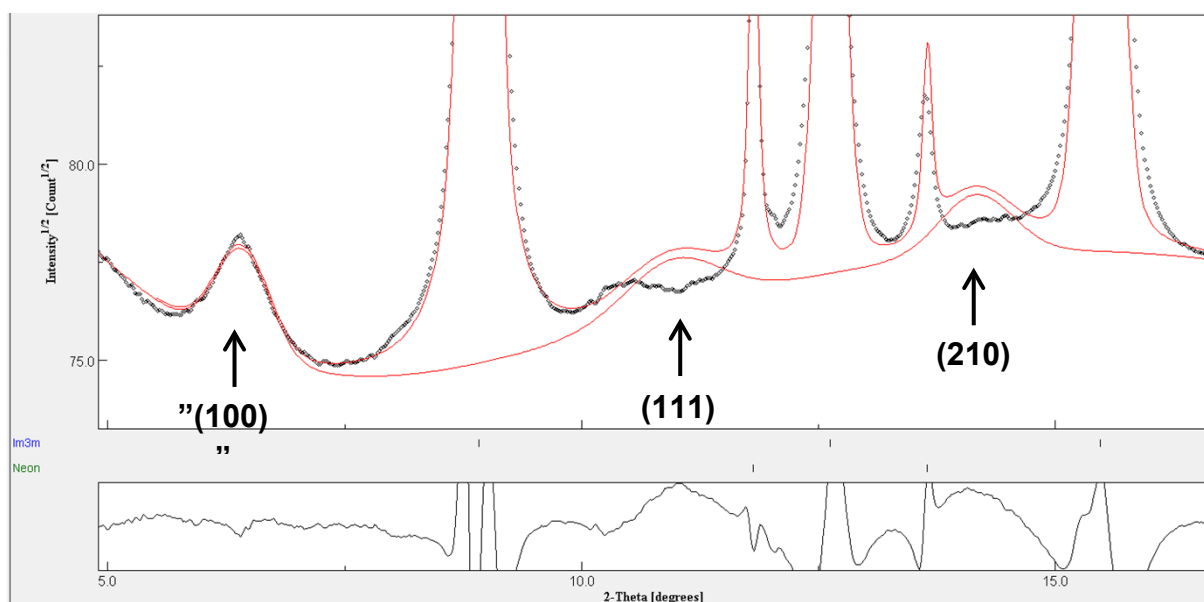

In Fig. S4 above we use the unit cell of the first model, but accounting for the broadening of the  $h+k+l = \text{odd}$  peaks that would arise from antiphase boundaries. The (100) peak has also been manually shifted to a much larger angle (i.e. no longer fits with the main peaks). Intensities of the 111 and 210 peaks are calculated from the observed intensity of the (100) peak based on the same model as before with Se only in the center of a  $Pm\bar{3}m$  cell and total Bi/Te disorder over the remaining sites. The result is clearly too much intensity in the (111) and (210) peaks (again the broad signal at about 10.5 degrees fit with the main peaks of rhenium).

It should be noted that the width of the (100) peak is so large that the assumption of a low value of  $\gamma$  in the expression above likely breaks down.

## Model 4 – A tetragonal unit cell

**Figure S6**

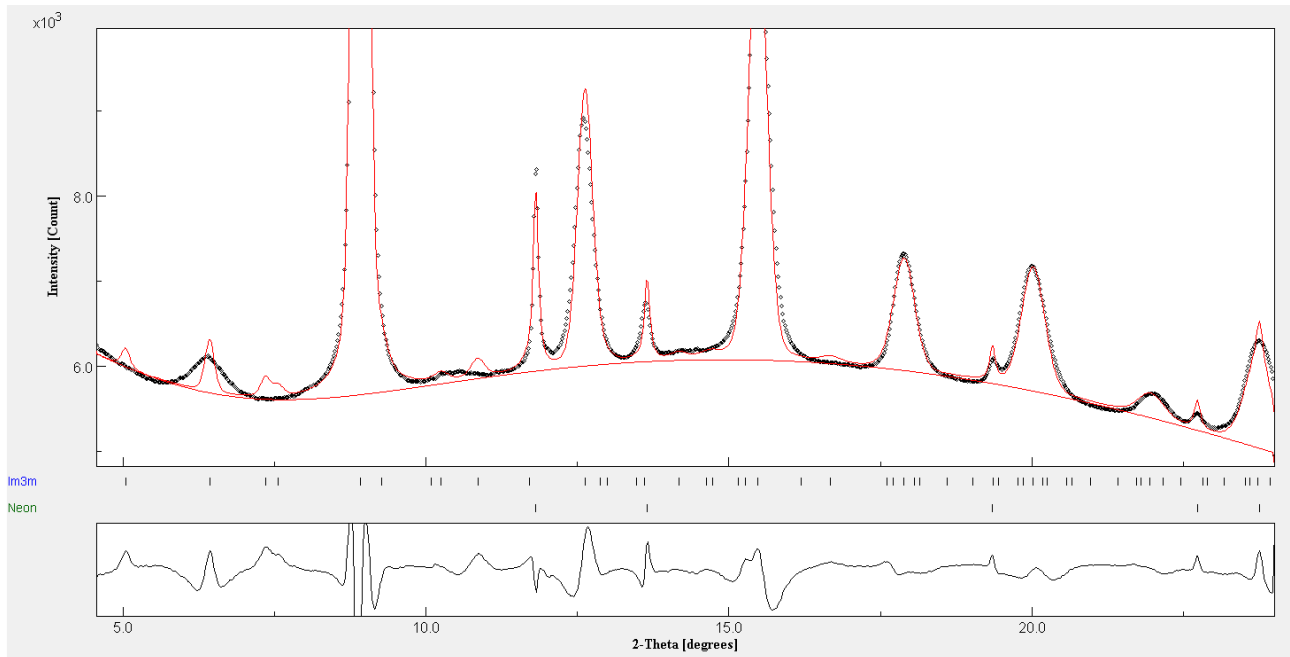

Bi<sub>2</sub>Te<sub>2</sub>Se as the  $I4/mmm$  cell claimed by Zhao *et al.* yields the fit in Fig. S6. Bi and Te were initially placed on the two  $4e$  sites ((0,0,0.4003) for Bi and (0,0,0.2077) for Te) reported by Zhao *et al.* and then allowed to refine freely, including swapping sites. This leads to complete Bi/Te disorder over these two sites. Se was fixed to the  $2a$  site at (0,0,0). The peaks at low angle ( $\sim 5$  and 7.5 degrees) that arise due to the lower tetragonal symmetry are definitely not present. However, this is the only case where the observed position of the “(100)” peak is in accordance with the model (the Miller index of the peak in this model is (101)). We have been unable to find atomic distributions that only remove the excess tetragonal peaks while keeping the “(100)” peak. The extra width of the “(100)” peak is also not accounted for in this model.
